# Supplementary material for: Two azido-bridged [2×2] cobalt(ii) grids featuring single-molecule magnet behaviour
Source: Royal Society of Chemistry journal article supplement (doi:10.1039/d0dt01461c), 2020-01-01
Supplement: d0dt01461c1.pdf [file d0dt01461c1.pdf]

*Supporting information*

## **Two Azido-Bridged [2 × 2] Cobalt(II) Grids Featuring Single-Molecule Magnet Behaviour**

Zhilin Guo,<sup>ab</sup> Yi-Fei Deng,<sup>\*a</sup> Yipei Zhang,<sup>a</sup> Zoe Pikramenou,<sup>b</sup> Yuan-Zhu Zhang<sup>\*a</sup>

<sup>a</sup> Department of Chemistry, Southern University of Science and Technology (SUSTech), Shenzhen 518055, China.

<sup>b</sup> School of Chemistry, University of Birmingham, Edgbaston, Birmingham B15 2TT, United Kingdom.

### **Experimental Section**

#### **Materials and Physical Measurements.**

3, 6-di(pyridin-2-yl)pyridazine (pydz) ligand and other chemicals are commercially available and used as received. 3,6-bis(3,5-dimethyl-1H-pyrazol-1-yl)pyridazine (pzdz) was synthesised according to the literature.<sup>1</sup> Elemental analyses (C, H, N) were measured by a vario EL cube CHNOS Elemental Analyzer Elementar Analysensysteme GmbH. FT-IR spectra were recorded in the range 600-4000 cm<sup>-1</sup> on a Bruker tensor II spectrophotometer. Powder X-ray diffraction (PXRD) measurements were recorded on a Rigaku Smartlab X-ray diffractometer. A PXRD pattern for **1** could not be obtained due to the loss of CHCl<sub>3</sub> interstitial solvent molecules. Magnetic measurements were carried out with a SQUID MPMS3 magnetometer. Magnetic data were corrected for the diamagnetism of the sample holder and for the diamagnetism of the sample using Pascal's constants.<sup>2</sup>

*Caution: Although no such behavior was observed during the experiment, azido salts are potentially explosive and should be handled with care.*

**Synthesis of {[Co<sup>II</sup>(pzdz)<sub>4</sub>(N<sub>3</sub>)<sub>4</sub>][BPh<sub>4</sub>]<sub>4</sub>}·4CH<sub>3</sub>CN·3CHCl<sub>3</sub>·2CH<sub>3</sub>OH (**1**).** Treatment of CoCl<sub>2</sub>·6H<sub>2</sub>O (72.5 mg, 0.31 mmol) and NaBPh<sub>4</sub> (135 mg, 0.39 mmol) in acetonitrile (5 mL) afforded a blue-greenish solution with white precipitate (NaCl), which was filtered off after 20 min.

Pzdz (90 mg, 0.31 mmol) in chloroform 5 mL, and NaN<sub>3</sub> (24.5 mg, 0.38 mmol) in methanol (5 mL), were added to the above solution. The resulting red solution was allowed to stand quietly for several days. Orange plate-like crystals were isolated via filtration, washed with methanol and dried in the air. Yield: 123 mg (48.3% based on Co salt). Selected IR data (cm<sup>-1</sup>): 2070 (s), 1478 (m), 1432 (s), 1354 (m), 1275 (w), 1137 (w), 1094 (m), 1043 (m), 982 (m). Anal. Calcd. C<sub>165</sub>H<sub>166</sub>B<sub>4</sub>N<sub>40</sub>O<sub>2</sub>Cl<sub>9</sub>Co<sub>4</sub>: C, 61.15; H, 5.20; N, 17.39. Found C, 60.71; H, 5.46; N, 17.15.

**Synthesis of {[Co<sup>II</sup><sub>4</sub>(pydz)<sub>4</sub>(N<sub>3</sub>)<sub>4</sub>][BPh<sub>4</sub>]<sub>4</sub>}·4CH<sub>3</sub>CN (**2**).** The synthesis of **2** was similar to **1** using pydz ligand instead. Orange block crystals were collected by filtration and washed with cold methanol and dried in the air. Yield 150 mg (70% based on Co salt). Selected IR data (cm<sup>-1</sup>): 2065 (s), 1433 (m), 1354 (m), 986 (m). Anal. Calcd. C<sub>156</sub>H<sub>126</sub>B<sub>4</sub>Co<sub>4</sub>N<sub>30</sub>: C, 69.40; H, 4.70; N, 15.56. Found C, 69.48; H, 4.29; N, 15.55.

## Crystallography

X-ray data for **1** and **2** were collected on a Bruker D8 VENTURE diffractometer with graphite monochromated Mo K $\alpha$  radiation ( $\lambda = 0.71073$  Å). Lorentz/polarization corrections were applied during data reduction and the structures were solved by direct methods (SHELXS-97). Refinements were performed by full-matrix least squares (SHELXL-97)<sup>3</sup> on F<sup>2</sup> and empirical absorption corrections (SADABS)<sup>4</sup> were applied. Anisotropic thermal parameters were used for the non-hydrogen atoms. Hydrogen atoms were added at calculated positions and refined using a riding model. Weighted R factors (*w*R) and the goodness-of-fit (S) values are based on F<sup>2</sup>; conventional R factors (R) are based on F, with F set to zero for negative F<sup>2</sup>. CCDC-1945133 (**1**) and 1945134 (**2**) contain the crystallographic data that can be obtained via [www.ccdc.cam.ac.uk/conts/retrieving.html](http://www.ccdc.cam.ac.uk/conts/retrieving.html) (or from the Cambridge Crystallographic Data Centre, 12, Union Road, Cambridge CB21EZ, UK; fax: (+44) 1223-336-033; or [deposit@ccdc.cam.ac.uk](mailto:deposit@ccdc.cam.ac.uk)).

**Table S1.** Selected bond lengths [Å] and angles [deg] for **1**.

|                   |           |                   |           |
|-------------------|-----------|-------------------|-----------|
| Co(1)-N(22)       | 2.175(2)  | Co(2)-N(28)       | 2.071(2)  |
| Co(1)-N(25)       | 2.076(2)  | Co(2)-N(4)        | 2.171(2)  |
| Co(1)-N(3)        | 2.157(2)  | Co(2)-N(7)        | 2.112(2)  |
| Co(1)-N(24)       | 2.119(2)  | Co(2)-N(25)       | 2.092(2)  |
| Co(1)-N(34)       | 2.078(2)  | Co(2)-N(9)        | 2.167(2)  |
| Co(1)-N(1)        | 2.122(2)  | Co(2)-N(6)        | 2.120(2)  |
| Co(3)-N(15)       | 2.171(2)  | Co(4)-N(16)       | 2.140(2)  |
| Co(3)-N(28)       | 2.064(2)  | Co(4)-N(34)       | 2.087(2)  |
| Co(3)-N(13)       | 2.146(2)  | Co(4)-N(18)       | 2.134(2)  |
| Co(3)-N(10)       | 2.161(2)  | Co(4)-N(31)       | 2.093(2)  |
| Co(3)-N(31)       | 2.095(2)  | Co(4)-N(21)       | 2.137(2)  |
| Co(3)-N(12)       | 2.112(2)  | Co(4)-N(19)       | 2.126(2)  |
| N(25)-Co(1)-N(22) | 89.35(8)  | N(28)-Co(3)-N(15) | 91.21(8)  |
| N(25)-Co(1)-N(3)  | 86.61(8)  | N(28)-Co(3)-N(13) | 93.47(8)  |
| N(25)-Co(1)-N(24) | 96.63(8)  | N(28)-Co(3)-N(10) | 87.13(8)  |
| N(25)-Co(1)-N(34) | 97.39(8)  | N(28)-Co(3)-N(31) | 97.59(8)  |
| N(25)-Co(1)-N(1)  | 159.40(8) | N(28)-Co(3)-N(12) | 158.46(8) |

|                   |           |                   |           |
|-------------------|-----------|-------------------|-----------|
| N(3)-Co(1)-N(22)  | 174.21(8) | N(13)-Co(3)-N(15) | 73.72(8)  |
| N(24)-Co(1)-N(22) | 74.21(8)  | N(13)-Co(3)-N(10) | 114.38(8) |
| N(24)-Co(1)-N(3)  | 110.37(8) | N(10)-Co(3)-N(15) | 171.81(8) |
| N(24)-Co(1)-N(1)  | 84.67(8)  | N(31)-Co(3)-N(15) | 86.13(8)  |
| N(34)-Co(1)-N(22) | 85.29(8)  | N(31)-Co(3)-N(13) | 157.20(8) |
| N(34)-Co(1)-N(3)  | 91.12(8)  | N(31)-Co(3)-N(10) | 86.13(8)  |
| N(34)-Co(1)-N(24) | 154.95(8) | N(31)-Co(3)-N(12) | 91.30(8)  |
| N(34)-Co(1)-N(1)  | 89.38(8)  | N(12)-Co(3)-N(15) | 109.02(8) |
| N(1)-Co(1)-N(22)  | 110.66(8) | N(12)-Co(3)-N(13) | 85.46(8)  |
| N(1)-Co(1)-N(3)   | 73.78(8)  | N(12)-Co(3)-N(10) | 73.88(8)  |
| N(28)-Co(2)-N(4)  | 91.75(8)  | N(34)-Co(4)-N(16) | 86.49(8)  |
| N(28)-Co(2)-N(7)  | 157.64(8) | N(34)-Co(4)-N(18) | 89.80(8)  |
| N(28)-Co(2)-N(25) | 101.15(8) | N(34)-Co(4)-N(31) | 102.55(8) |
| N(28)-Co(2)-N(9)  | 86.81(8)  | N(34)-Co(4)-N(21) | 87.17(8)  |
| N(28)-Co(2)-N(6)  | 91.88(8)  | N(34)-Co(4)-N(19) | 159.67(8) |
| N(7)-Co(2)-N(4)   | 108.90(8) | N(18)-Co(4)-N(16) | 73.96(8)  |
| N(7)-Co(2)-N(9)   | 73.26(8)  | N(18)-Co(4)-N(21) | 108.39(8) |
| N(7)-Co(2)-N(6)   | 85.88(8)  | N(31)-Co(4)-N(16) | 86.91(8)  |
| N(25)-Co(2)-N(4)  | 85.50(8)  | N(31)-Co(4)-N(18) | 156.63(8) |
| N(25)-Co(2)-N(7)  | 89.26(8)  | N(31)-Co(4)-N(21) | 92.16(8)  |
| N(25)-Co(2)-N(9)  | 90.35(8)  | N(31)-Co(4)-N(19) | 85.61(8)  |
| N(25)-Co(2)-N(6)  | 156.11(8) | N(21)-Co(4)-N(16) | 173.24(8) |
| N(9)-Co(2)-N(4)   | 175.27(8) | N(19)-Co(4)-N(16) | 112.76(8) |
| N(6)-Co(2)-N(4)   | 74.06(8)  | N(19)-Co(4)-N(18) | 89.48(8)  |
| N(6)-Co(2)-N(9)   | 110.47(8) | N(19)-Co(4)-N(21) | 73.81(8)  |

**Table S2.** Selected bond lengths [Å] and angles [deg] for **2**.

|                   |           |                   |           |
|-------------------|-----------|-------------------|-----------|
| Co(1)-N(1)        | 2.142(1)  | Co(1)-N(2)        | 2.124(1)  |
| Co(1)-N(3B)       | 2.137(1)  | Co(1)-N(4B)       | 2.174(1)  |
| Co(1)-N(5)        | 2.068(1)  | Co(1)-N(5A)       | 2.077(1)  |
| N(1)-Co(1)-N(5)   | 92.99(5)  | N(1)-Co(1)-N(5A)  | 157.97(5) |
| N(1)-Co(1)-N(2)   | 75.21(5)  | N(1)-Co(1)-N(3B)  | 104.29(5) |
| N(1)-Co(1)-N(4B)  | 81.07(5)  | N(2)-Co(1)-N(5)   | 98.58(5)  |
| N(2)-Co(1)-N(4B)  | 101.10(5) | N(2)-Co(1)-N(5A)  | 85.84(5)  |
| N(2)-Co(1)-N(3B)  | 175.65(5) | N(3B)-Co(1)-N(5A) | 93.75(5)  |
| N(3B)-Co(1)-N(4B) | 74.57(5)  | N(3B)-Co(1)-N(5)  | 85.76(5)  |
| N(4B)-Co(1)-N(5)  | 157.19(5) | N(4B)-Co(1)-N(5A) | 91.90(5)  |
| N(5)-Co(1)-N(5A)  | 100.96(7) |                   |           |

Symmetry transformations used to generate equivalent atoms:

A:  $y+1/4, -x+7/4, -z+3/4$     B:  $-y+7/4, x-1/4, -z+3/4$

**Table S3.** Parameters fitted by a generalized Debye model for **1** at 1500 Oe dc field.

| <i>T</i> / K | $\tau$ / s            | $\alpha$ |
|--------------|-----------------------|----------|
| 2.0          | $1.02 \times 10^{-1}$ | 0.39     |
| 2.1          | $6.29 \times 10^{-2}$ | 0.39     |
| 2.2          | $3.52 \times 10^{-2}$ | 0.39     |
| 2.3          | $1.85 \times 10^{-2}$ | 0.38     |
| 2.4          | $1.04 \times 10^{-2}$ | 0.37     |
| 2.5          | $5.65 \times 10^{-3}$ | 0.36     |
| 2.6          | $3.23 \times 10^{-3}$ | 0.35     |
| 2.7          | $1.88 \times 10^{-3}$ | 0.35     |
| 2.8          | $1.17 \times 10^{-3}$ | 0.34     |
| 2.9          | $7.43 \times 10^{-4}$ | 0.33     |
| 3.0          | $4.96 \times 10^{-4}$ | 0.31     |
| 3.1          | $3.29 \times 10^{-4}$ | 0.31     |
| 3.2          | $2.27 \times 10^{-4}$ | 0.30     |
| 3.3          | $1.59 \times 10^{-4}$ | 0.28     |
| 3.4          | $1.25 \times 10^{-4}$ | 0.26     |

**Table S4.** Parameters fitted by a generalized Debye model for **2** at 2000 Oe dc field.

| <i>T</i> / K | $\tau$ / s            | $\alpha$ |
|--------------|-----------------------|----------|
| 3.0          | $7.73 \times 10^{-2}$ | 0.32     |
| 3.1          | $3.99 \times 10^{-2}$ | 0.26     |
| 3.2          | $2.29 \times 10^{-2}$ | 0.21     |
| 3.3          | $1.40 \times 10^{-2}$ | 0.16     |
| 3.4          | $8.70 \times 10^{-3}$ | 0.14     |
| 3.5          | $5.62 \times 10^{-3}$ | 0.12     |
| 3.6          | $3.64 \times 10^{-3}$ | 0.10     |
| 3.7          | $2.42 \times 10^{-3}$ | 0.09     |
| 3.8          | $1.63 \times 10^{-3}$ | 0.08     |
| 3.9          | $1.11 \times 10^{-3}$ | 0.06     |
| 4.0          | $7.74 \times 10^{-4}$ | 0.05     |
| 4.1          | $5.50 \times 10^{-4}$ | 0.04     |
| 4.2          | $3.96 \times 10^{-4}$ | 0.03     |
| 4.3          | $2.78 \times 10^{-4}$ | 0.05     |
| 4.4          | $1.97 \times 10^{-4}$ | 0.06     |
| 4.5          | $1.33 \times 10^{-4}$ | 0.07     |

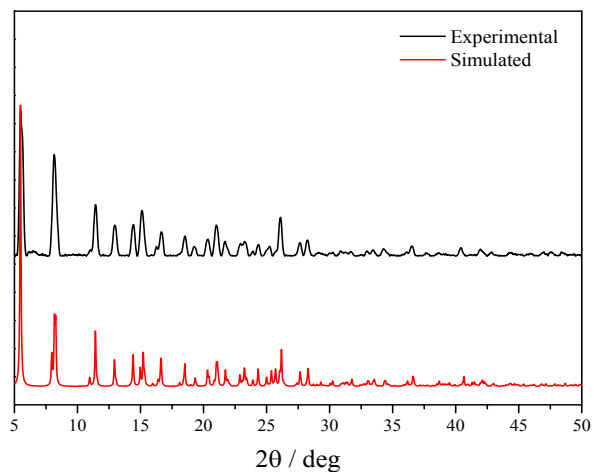

**Fig. S1** Powder X-ray diffraction pattern and the simulation from the single crystal data of **2**.

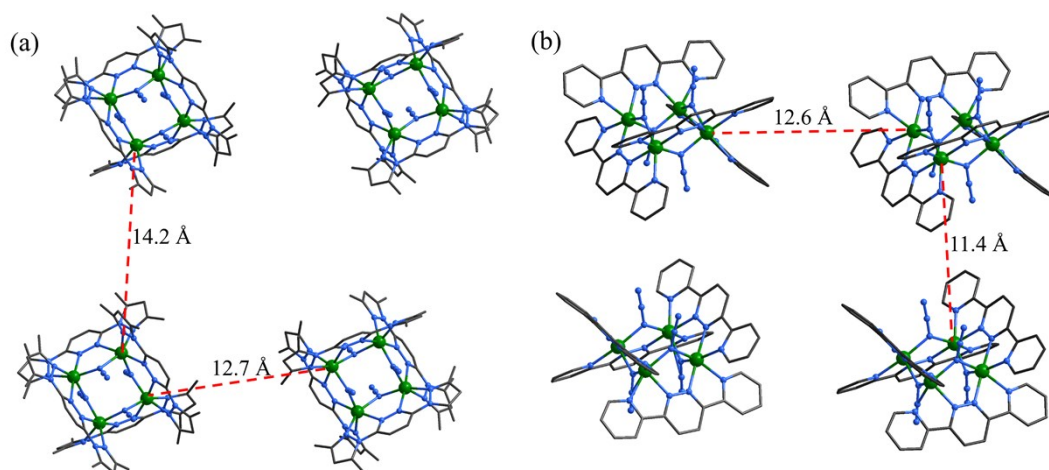

**Fig. S2** The packing diagram of **1** (a) and **2** (b). The dashed line shows the nearest intermolecular Co...Co separation. Hydrogen atoms, counter anions and interstitial solvent molecules are omitted for clarify. Colour codes: Co(II), green; C, grey; N, light blue.

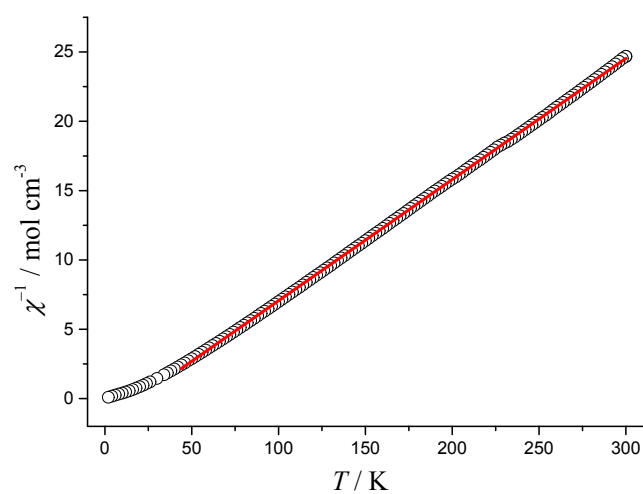

**Fig. S3** Temperature dependent  $\chi^{-1}$  plots for **1** measured at 1000 Oe dc field. The red line represents the Curie-Weiss fit to the data.

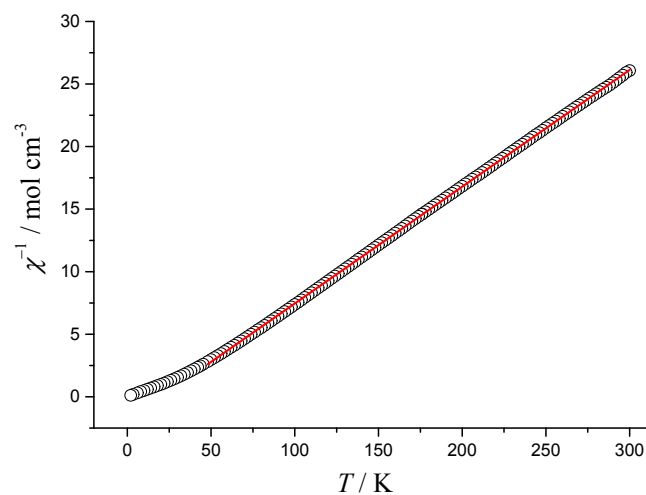

**Fig. S4** Temperature dependent  $\chi^{-1}$  plots for **2** measured at 1000 Oe dc field. The red line represents the Curie-Weiss fit to the data.

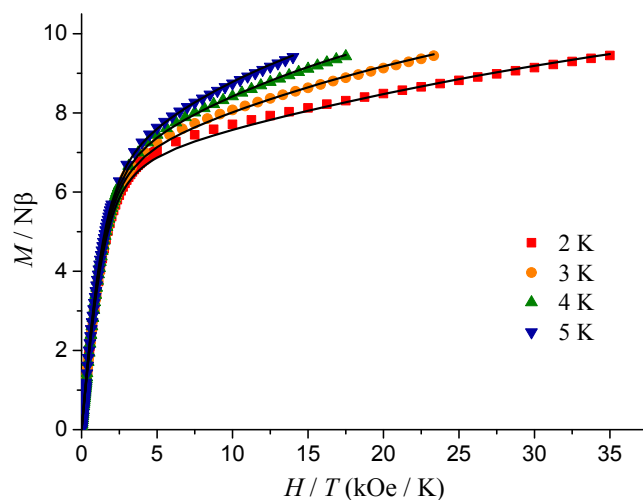

**Fig. S5** Reduced magnetization data for **1** at 2-5 K. The solid lines represent the fit to the data.

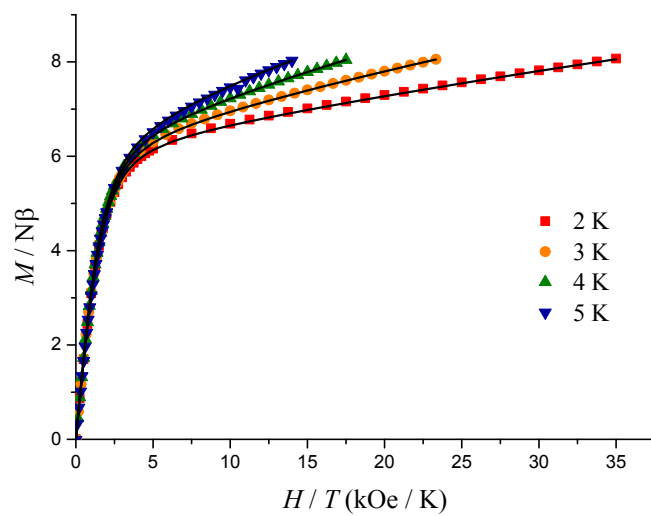

**Fig. S6** Reduced magnetization data for **2** at 2-5 K. The solid lines represent the fit to the data.

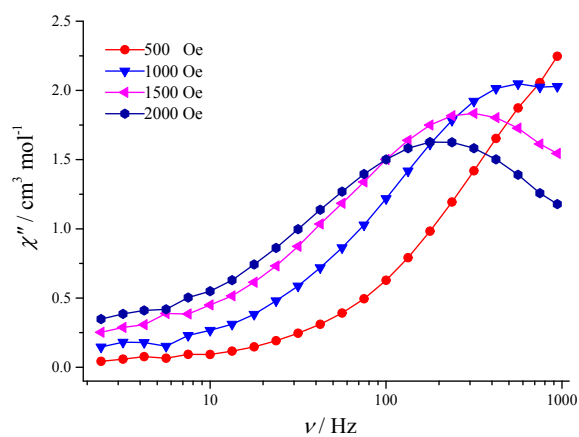

**Fig. S7** Frequency dependence of the out-of-phase ( $\chi''$ ) ac susceptibility for **1** as a function of applied field at 3 K. The lines are guides to the eye.

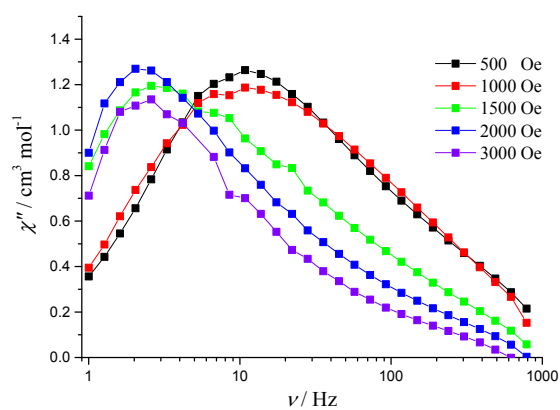

**Fig. S8** Frequency dependence of the out-of-phase ( $\chi''$ ) ac susceptibility for **2** as a function of applied field at 3 K. The lines are guides to the eye.

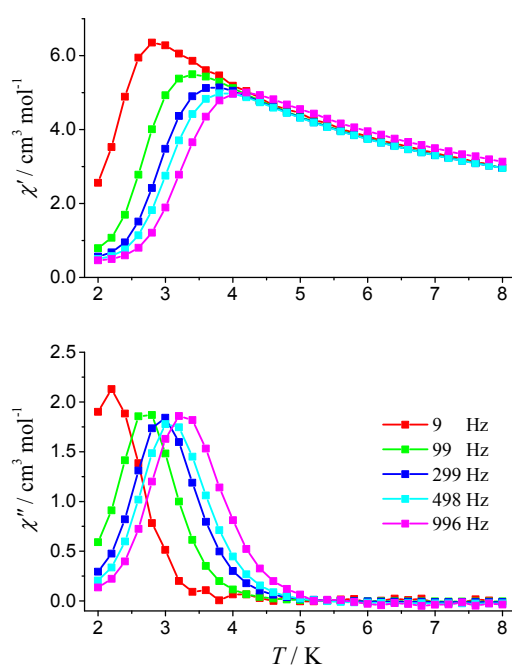

**Fig. S9** Temperature dependence of the in-phase ( $\chi'$ ) and out-of-phase ( $\chi''$ ) ac susceptibility for **1** under 1500 Oe dc field. Solid lines are guides for the eye.

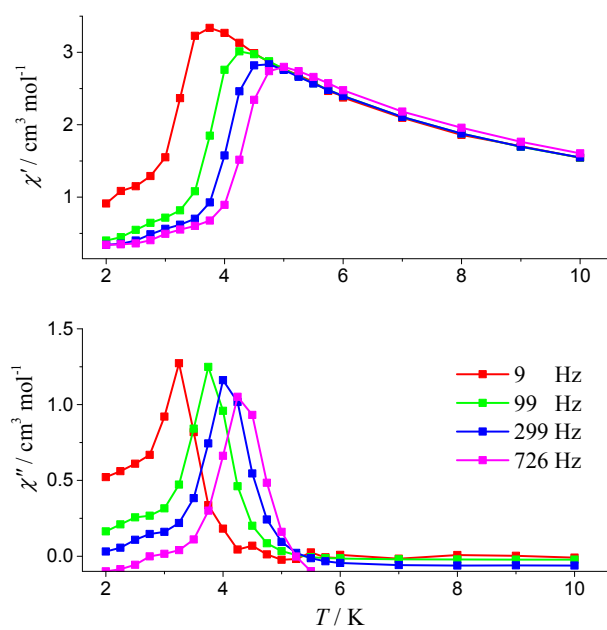

**Fig. S10** Temperature dependence of the in-phase ( $\chi'$ ) and out-of-phase ( $\chi''$ ) ac susceptibility for **2** under 2000 Oe dc field. Solid lines are guides for the eye.

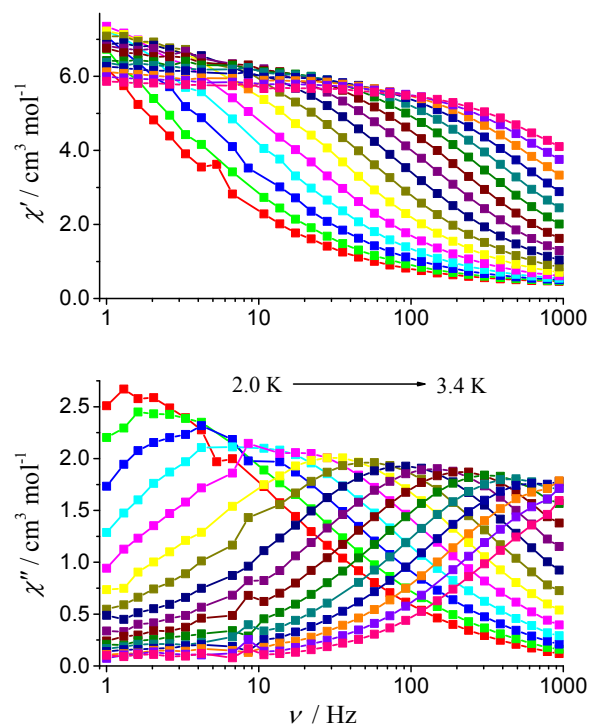

**Fig. S11** Frequency dependence of the in-phase ( $\chi'$ ) and out-of-phase ( $\chi''$ ) ac susceptibility for **1** under 1500 Oe dc field. Solid lines are guides for the eye.



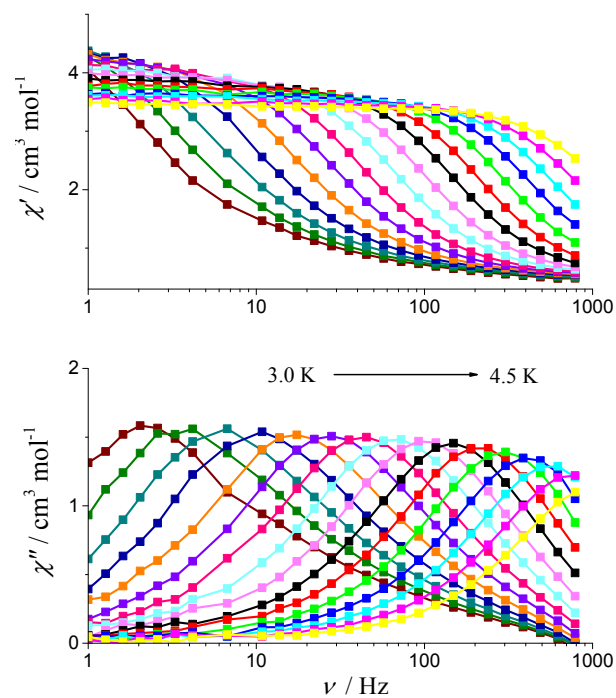

**Fig. S12** Frequency dependence of the in-phase ( $\chi'$ ) and out-of-phase ( $\chi''$ ) ac susceptibility for **2** under 2000 Oe dc field. Solid lines are guides for the eye.

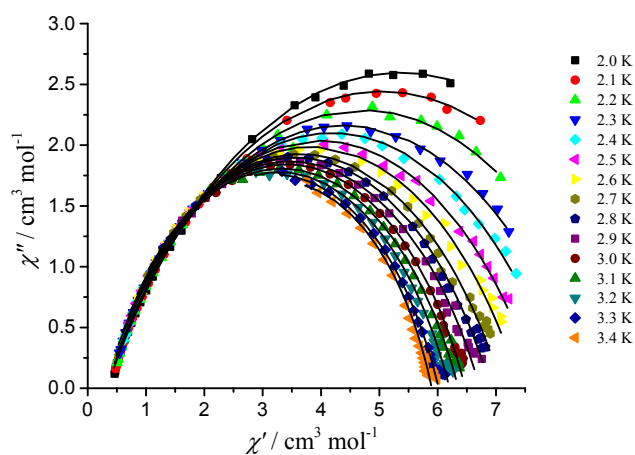

**Fig. S13** Cole-Cole plots of **1** under 1500 Oe dc field. The lines represent the fit to the data.

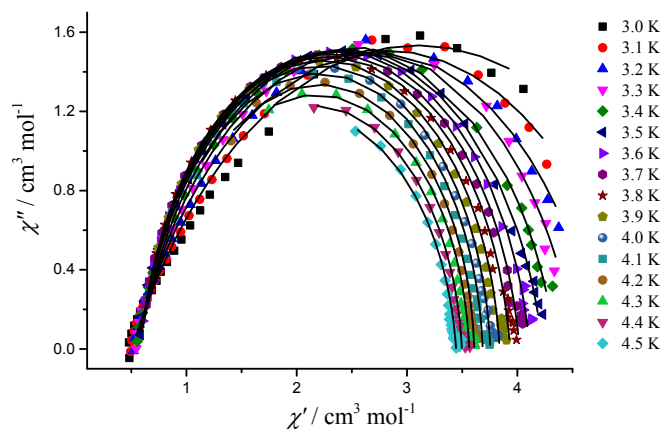

**Fig. S14** Cole-Cole plots of **2** under 2000 Oe dc field. The lines represent the fit to the data.

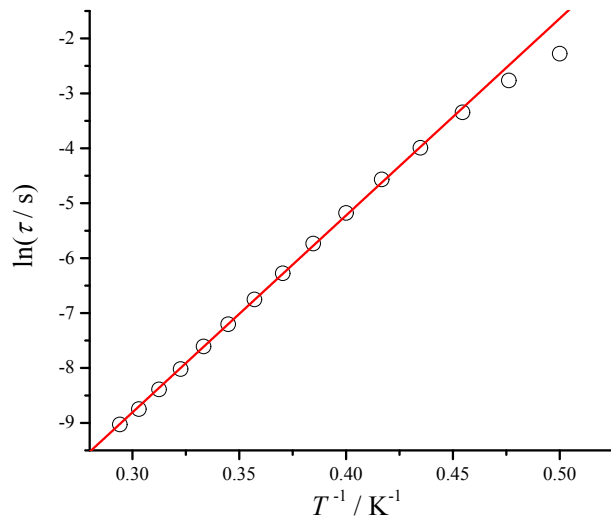

**Fig. S15** Temperature dependence of the relaxation time for **1** under 1500 Oe dc field. The line represents the fit by Arrhenius Law.

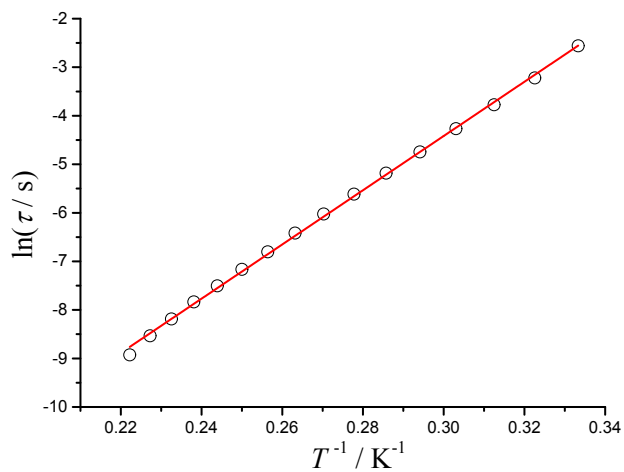

**Fig. S16** Temperature dependence of the relaxation time for **2** under 2000 Oe dc field. The line represents the fit by Arrhenius Law.

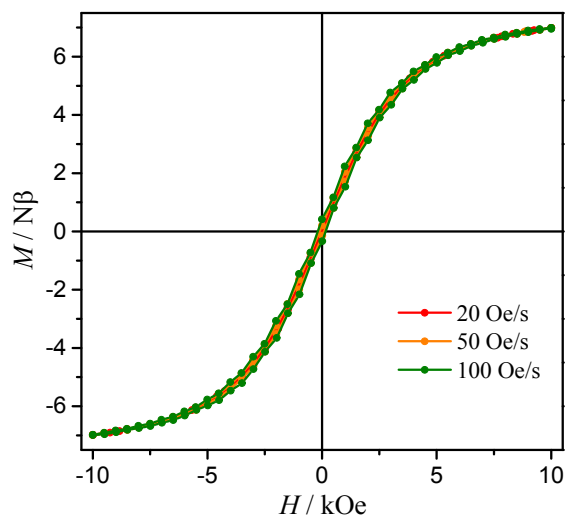

**Fig. S17** Magnetic hysteresis measurements of **1** recorded at 2.0 K with field sweep rate of 20, 50 and 100 Oe/s.

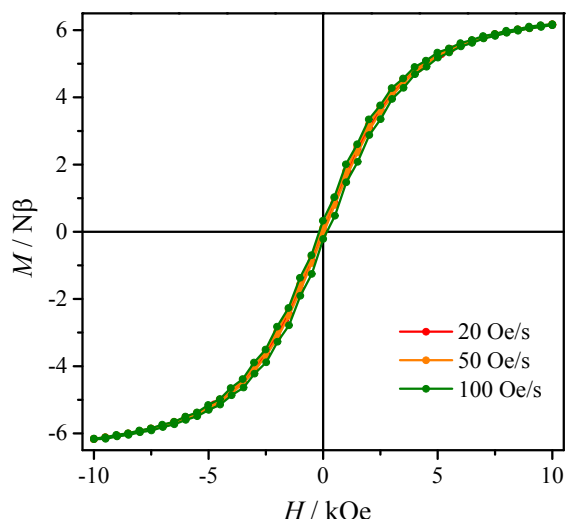

**Fig. S18** Magnetic hysteresis measurements of **2** recorded at 2.0 K with field sweep rate of 20, 50 and 100 Oe/s.

## References

- 1 L. K. Thompson, T. C. Woon, D. B. Murphy, E. J. Gabe, F. L. Lee, and Y. Le Page, *Inorg. Chem.* 1985, **24**, 4719.
- 2 G. A. Bain and J. F. Berry, *J. Chem. Educ.*, 2008, **85**, 532.
- 3 (a) Sheldrick, G. M., SHELXL-2014, Program for the solution of crystal structures. University of Göttingen, Göttingen, Germany, 2014; (b) Sheldrick, G. M., SHELXL-2014, Program for Crystal Structure Refinement. University of Göttingen, Göttingen, Germany, 2014.
- 4 Sheldrick, G. M., SADABS, v.2.01, Bruker/Siemens Area Detector Absorption Correction Program. Bruker AXS: Madison, Wisconsin, 1998.
